# Supplementary figures and images for: Effect of green tea on reward learning in healthy individuals: a randomized, double-blind, placebo-controlled pilot study
Source: Springer Nature journal article supplement (doi:10.1186/1475-2891-12-84), 2013-06-18

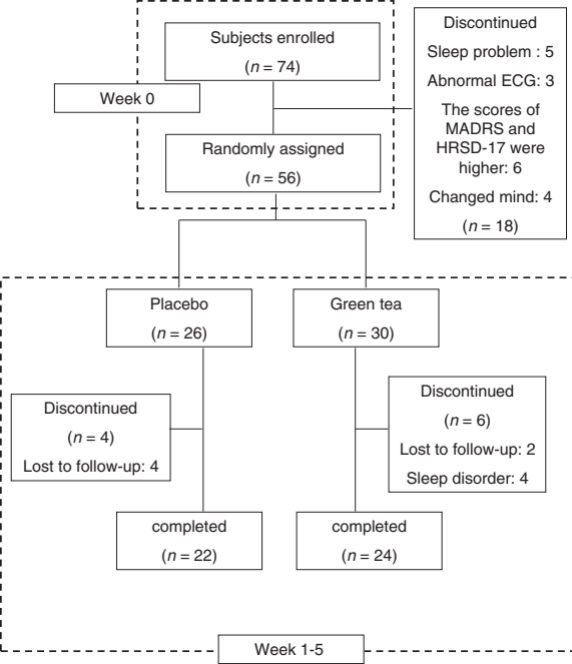

Supplement: 12937_2013_664_MOESM1_ESM.pdf [file 12937_2013_664_MOESM1_ESM.pdf]

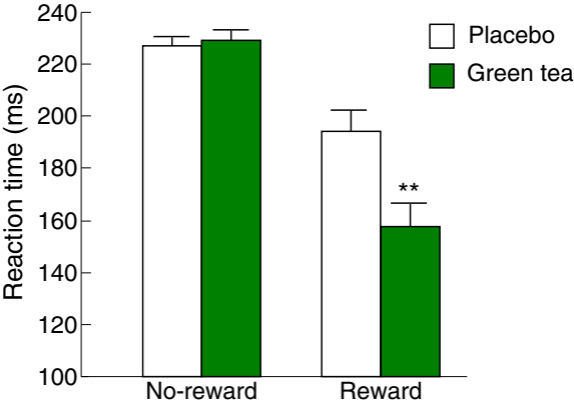

Supplement: 12937_2013_664_MOESM2_ESM.pdf [file 12937_2013_664_MOESM2_ESM.pdf]

A

MADRS

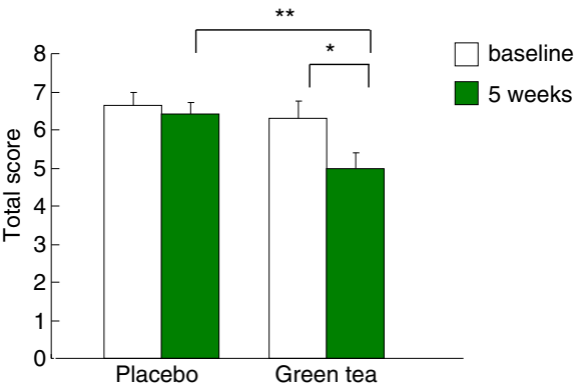

B

HRSD-17

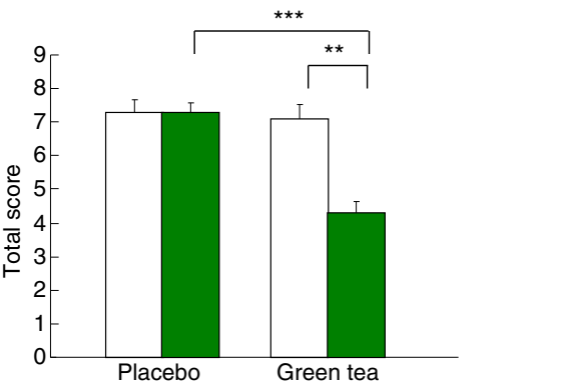

Supplement: 12937_2013_664_MOESM3_ESM.pdf [file 12937_2013_664_MOESM3_ESM.pdf]
